# Supplementary material for: SyMPLER Palliative Care: a qualitative study of patient experiences with a symptom monitoring program and self-referral to specialty palliative care
Source: Research Square preprint supplement (doi:10.21203/rs.3.rs-7420494/v1), 2025-11-11
Supplement: Supplementary file 1 [file 9015e0af50d7996ceaa5723c.docx]

**SyMPLER Participant Interview Guide**

***[Introduction]*** Thank you for speaking with me today. The purpose of this interview is to learn about your experience participating in the symptom monitoring program. As we talked about during the consent process, your participation is voluntary, and you do not need to answer any questions that you do not want to. You can also end the interview at any time without penalty or loss of any benefits to which you are otherwise entitled. Everything you tell us will be confidential. We will never use your name in any reports or articles. I would also like to record our session for the purposes of data collection for our research. The recording will not be used to identify you in any way. Do you have any questions before we start?

***[Section 1: Feasibility & Acceptability of the Symptom Monitoring Program]*** To start, I would like to ask a few questions about what you think of the symptom monitoring program.

- What is your overall opinion of the symptom monitoring program?
- What has been going well with the program?
- What has not gone well with the program?
- What was your experience like when completing the surveys on your cell phone or personal electronic device?
  - What made it hard or difficult to complete these surveys?
  - What made it easy to complete these surveys?
- How often did you receive notifications to complete surveys?
  - What made it hard or difficult to remember to complete these surveys?
  - What made it easy to remember to complete these surveys?
- How well did the survey allow you to report or explain how you were feeling?
- Is there anything you would change about this program?
- Would you recommend this program to other patients with a cancer diagnosis?
  - Why/Why not? (please explain)

***[Section 2: Education about Palliative Care]*** When you first enrolled in the symptom monitoring program, you were asked to view a website about palliative care.

- What did you know about palliative care before viewing the website?
- What do you remember about the palliative care website?
- What did you learn about palliative care after viewing the website?
- What would you change about the website?
- Would you recommend the website to another patient wanting information on palliative care?

You were also given a printed handout about palliative care.

- Do you remember receiving the handout?
  - If so, do you remember reading it?
- What did you learn about palliative care from the handout?
- What would you change about the handout?
- After reading the handout, do you think you knew enough about palliative care to request this service?
  - What additional information would you have wanted to know about palliative care?
- Would you recommend the printed handout to another patient wanting information on palliative care?
- If you had to choose, did you prefer the website or the printed handout for the information provided?
  - …If you thought both provided enough information you can say both equally.

***[Section 3: Acceptability of Palliative Care Self-Referral]*** After reporting symptoms through the weekly surveys, you were asked if you wanted to see a palliative care specialist during your next oncology visit.

- What did you think about the option to request to see a palliative care specialist?
- At any point, did you select “Yes” and request to see a palliative care specialist?
  - ***[YES]🡪***
    - What made you decide to request palliative care?
    - What was your experience like scheduling this appointment with a palliative care specialist?
      - What made it hard or difficult to schedule this appointment?
      - What made it easy to schedule this appointment?
    - How has palliative care affected your medical care?
  - ***[NO]🡪*** Do you think you might request palliative care in the future?
    - Why or why not?
- What do you think about being able to request palliative care yourself?

***[Section 4: Acceptability of Medical Team Contact]*** After reporting symptoms through the weekly surveys, you were also asked if you wanted a member of the medical team to contact you within 2 days to discuss your symptoms.

- At any point, did you select “Yes” to request contact from the medical team?
  - ***[YES] 🡪***
    - Why did you want to be contacted by the medical team?
    - Did the medical team contact you?
      - If so, how helpful was it to be contacted by the medical team?
  - ***[NO] 🡪*** Do you think you might request that the medical team contact you in the future through this program?
    - Why or why not?
- What do you think about being able to request to contact the medical team directly?

***[Section 5: Acceptability of Caregiver Participation]*** In this study, patients were asked to identify a caregiver who could complete symptom monitoring surveys on their behalf.

- Did you have a caregiver who also participated in this study?
  - ***[YES] 🡪***
    - What is your relationship to the caregiver who also participated in this study?
    - Do you live with this person?
    - On average, how many hours per day do you spend with this person?
    - Does this person come with you to medical appointments? If so, how often (e.g. 100%, 50%, etc.)?
- What do you think about including caregivers in this program?
- What do you think about having someone, like a caregiver, report symptoms for you?
- What do you think about having someone, like a caregiver, request palliative care on your behalf?
- What do you think about having someone, like a caregiver, request that the medical team contact you?
- Is there anything you wish you could change about how caregivers use this program?

***[Conclusion]*** Thank you for taking time to speak with me today. Your comments were very helpful. Is there anything that we haven’t discussed that you would like to share?
